# Supplementary material
Source: publisher figshare collection journal article supplement (https://tandf.figshare.com/ndownloader/files/13087277)
Supplement: Supplementary file 1 [file 13087277]

Hanc, M., McAndrew, C. and Ucci, M. (2018). Conceptual approaches to wellbeing in buildings: a scoping review. *Building Research & Information*.

## **Appendix**

**Table A1.** Description of wellbeing conceptual themes used in the review

| Wellbeing theme                                            | Description                                                                                                                                                                                                                                                                                                                                                                                                                                                                                                                                                                                                                                                                                                                                                                                                                                                                                                                                                                                                                                                                                                                      |
|------------------------------------------------------------|----------------------------------------------------------------------------------------------------------------------------------------------------------------------------------------------------------------------------------------------------------------------------------------------------------------------------------------------------------------------------------------------------------------------------------------------------------------------------------------------------------------------------------------------------------------------------------------------------------------------------------------------------------------------------------------------------------------------------------------------------------------------------------------------------------------------------------------------------------------------------------------------------------------------------------------------------------------------------------------------------------------------------------------------------------------------------------------------------------------------------------|
| Environmental Satisfaction, Quality and / or Comfort (ENV) | Environmental satisfaction is defined by Ibern et al. (2013) as the subjective appraisal of the objective qualities of an environment. This is grounded in judgement about how much the environment meets the users' needs and expectations. We adopt Shin's (2015) definition of environmental comfort as the 'physical/physiological sensation and perception of discrete environmental stimuli from one's immediate surroundings' (p. 4).                                                                                                                                                                                                                                                                                                                                                                                                                                                                                                                                                                                                                                                                                     |
| Hedonic or Subjective Wellbeing (HED)                      | Historically associated with 'happiness', Ryan and Deci (2001) note subjective wellbeing 'consists of three components: life satisfaction, the presence of positive mood, and the absence of negative mood, together often summarized as happiness' (p. 144). It is characterised in contemporary literature as the balance of positive / negative affect, the evaluation of satisfaction with various domains of life (e.g. work, leisure), and/or global life satisfaction (Keyes, Shmotkin, & Ryff, 2002). Life satisfaction has been described as the 'hallmark' of subjective wellbeing (Diener et al., 1985), defined by Shin and Johnson (1978) as 'a global assessment of a person's quality of life according to his chosen criteria' (p. 478). Tatarkiewicz (1976) has noted that 'happiness requires total satisfaction, that is satisfaction with life as a whole' (p. 8). Quality of life is a similarly broad term used to represent "how well human needs are met or the extent to which individuals or groups perceive satisfaction or dissatisfaction in various life domains" (Costanza et al., 2007, p. 267). |
| Physical Health (PH)                                       | This category refers to physical health, which we view through the definitional lens of Veenhoven (2008) as the "absence of illness or defect" (p. 450). As Veenhoven notes, physical health is an objective measure attained through medical assessments or subjective self-reports.                                                                                                                                                                                                                                                                                                                                                                                                                                                                                                                                                                                                                                                                                                                                                                                                                                            |
| Mental Health (MH)                                         | Ill-being (which has also been characterised as psychological distress) has been noted to include anxiety, depression and other negative effects (Headey and Wooden, 2004). This paper excludes conditions with a more enduring pathology such as schizophrenia and bi-polar disorders.                                                                                                                                                                                                                                                                                                                                                                                                                                                                                                                                                                                                                                                                                                                                                                                                                                          |
| Social Wellbeing (SOC)                                     | Social well-being has been characterised along the dimensions of social integration, social contribution, social cohesion, social actualisation and social acceptance (Keyes, 1998). Recent definitions have included the notion of 'social capital' (see for instance, Helliwell & Putnam, 2004).                                                                                                                                                                                                                                                                                                                                                                                                                                                                                                                                                                                                                                                                                                                                                                                                                               |
| Productivity and Cognitive Performance (PRO)               | Although there is no single accepted definition of productivity, there is consensus that productivity must be defined in terms of a ratio of output variables to input variables (Cascio, 1987; Mahoney, 1988). Conversely, cognitive performance is defined as the capacity to perform mental processes, this extends across a variety of basic cognitive functions such as reasoning, understanding, remembering and problem solving (Bernstein, Penner, Clarke-Stewart, & Roy, 2003).                                                                                                                                                                                                                                                                                                                                                                                                                                                                                                                                                                                                                                         |
| Eudaimonic Wellbeing (EUD)                                 | Traditionally connected with the term 'human potential' (see Ryan & Deci, 2001), today psychological well-being is described as the 'perception of engagement with existential challenges of life' (Keyes, Shmotkin, & Ryff, 2002, p. 1007). This has been characterised as a sense of control or autonomy, feeling of meaning and purpose, personal expressiveness, feelings of belongingness, social contribution, competence, personal growth, and self-acceptance.                                                                                                                                                                                                                                                                                                                                                                                                                                                                                                                                                                                                                                                           |
| Other                                                      | This categorisation is used to capture conceptualisations and/or proxies of wellbeing that are not included in the above.                                                                                                                                                                                                                                                                                                                                                                                                                                                                                                                                                                                                                                                                                                                                                                                                                                                                                                                                                                                                        |
| Unspecified                                                | The authors of the paper do not provide a definition or detail on how they operationalised wellbeing.                                                                                                                                                                                                                                                                                                                                                                                                                                                                                                                                                                                                                                                                                                                                                                                                                                                                                                                                                                                                                            |

**Table A2.** Wellbeing and buildings: Conceptual themes and subthemes used by the papers included in review

| PAPER CITATION /<br>CONCEPTUAL SUBTHEMES                               | Conceptual themes                                                  |                   |                                    |                        |            |                          |                                                    |                             |  |
|------------------------------------------------------------------------|--------------------------------------------------------------------|-------------------|------------------------------------|------------------------|------------|--------------------------|----------------------------------------------------|-----------------------------|--|
|                                                                        | ENV<br>Environmental<br>Quality,<br>Satisfaction<br>and/or Comfort | EUD<br>Eudaimonic | HED<br>Hedonic<br>or<br>Subjective | MH<br>Mental<br>health | O<br>Other | PH<br>Physical<br>health | PRO<br>Productivity<br>or cognitive<br>performance | SOC U<br>Social Unspecified |  |
| <b>Abell, Alhusban, Alhusban, &amp; Lurasi (2013)</b>                  |                                                                    |                   |                                    |                        |            |                          |                                                    | 1                           |  |
| <b>Agha-Hosseini, El-Jouzi, Elmualim, Ellis, &amp; Williams (2013)</b> |                                                                    |                   |                                    |                        |            |                          |                                                    |                             |  |
| Building Design and Facilities                                         | 1                                                                  |                   |                                    |                        |            |                          |                                                    |                             |  |
| Control                                                                | 1                                                                  |                   |                                    |                        |            |                          |                                                    |                             |  |
| Indoor Environmental Quality                                           | 1                                                                  |                   |                                    |                        |            |                          |                                                    |                             |  |
| Productivity                                                           |                                                                    |                   |                                    |                        |            |                          | 1                                                  |                             |  |
| Satisfaction                                                           |                                                                    |                   | 1                                  |                        |            |                          |                                                    |                             |  |
| Wellbeing                                                              |                                                                    |                   |                                    |                        |            |                          |                                                    | 1                           |  |
| <b>Alvaro, Wilkinson, Gallant, Kostovski, &amp; Gardner (2016)</b>     |                                                                    |                   |                                    |                        |            |                          |                                                    |                             |  |
| Building Design and Facilities                                         | 1                                                                  |                   |                                    |                        |            |                          |                                                    |                             |  |
| Comfort                                                                | 1                                                                  |                   |                                    |                        |            |                          |                                                    |                             |  |
| Frailty, mobility and safety                                           |                                                                    |                   |                                    |                        |            | 1                        |                                                    |                             |  |
| Illness                                                                |                                                                    |                   |                                    |                        |            | 1                        |                                                    |                             |  |
| Intention to Quit                                                      |                                                                    |                   |                                    |                        | 1          |                          |                                                    |                             |  |
| Other                                                                  | 1                                                                  |                   |                                    | 1                      |            |                          |                                                    | 1                           |  |
| Participation and Interaction                                          |                                                                    |                   |                                    |                        |            |                          |                                                    | 1                           |  |
| Perceptions of Improvement                                             |                                                                    |                   |                                    |                        | 1          |                          |                                                    |                             |  |
| Personal Growth                                                        |                                                                    | 2                 |                                    |                        |            |                          |                                                    |                             |  |
| Psychological States and Traits                                        |                                                                    |                   |                                    | 1                      |            |                          |                                                    |                             |  |
| Satisfaction                                                           |                                                                    |                   | 1                                  |                        |            |                          |                                                    |                             |  |
| Sense of Inclusion                                                     |                                                                    |                   |                                    |                        |            |                          |                                                    | 1                           |  |
| Stress                                                                 |                                                                    |                   |                                    | 1                      |            |                          |                                                    |                             |  |
| <b>Bluyssens, Janssen, Van den Brink, &amp; De Kluizenaar (2011)</b>   |                                                                    |                   |                                    |                        |            |                          |                                                    |                             |  |
| Affect                                                                 |                                                                    |                   | 1                                  |                        |            |                          |                                                    |                             |  |
| Building Design and Facilities                                         | 1                                                                  |                   |                                    |                        |            |                          |                                                    |                             |  |
| Control                                                                | 1                                                                  |                   |                                    |                        |            |                          |                                                    |                             |  |
| Control/Autonomy                                                       |                                                                    | 1                 |                                    |                        |            |                          |                                                    |                             |  |
| Familial Context                                                       |                                                                    |                   |                                    |                        |            |                          |                                                    | 1                           |  |
| Indoor Environmental Quality                                           | 1                                                                  |                   |                                    |                        |            |                          |                                                    |                             |  |
| Negative Spatial Experiences                                           |                                                                    |                   |                                    |                        |            |                          |                                                    | 1                           |  |
| Other                                                                  |                                                                    |                   |                                    |                        |            |                          |                                                    | 1                           |  |
| Participation and Interaction                                          |                                                                    |                   |                                    |                        |            |                          |                                                    | 1                           |  |
| Psychological States and Traits                                        |                                                                    |                   |                                    | 1                      | 1          |                          |                                                    |                             |  |
| Self-reported symptoms                                                 |                                                                    |                   |                                    |                        |            | 1                        |                                                    |                             |  |
| Sick Building Syndrome                                                 |                                                                    |                   |                                    |                        |            | 1                        |                                                    |                             |  |

| Conceptual themes                         |                                                                    |                   |                                    |                        |            |                          |                                                    |     |                  |
|-------------------------------------------|--------------------------------------------------------------------|-------------------|------------------------------------|------------------------|------------|--------------------------|----------------------------------------------------|-----|------------------|
| PAPER CITATION /<br>CONCEPTUAL SUBTHEMES  | ENV<br>Environmental<br>Quality,<br>Satisfaction<br>and/or Comfort | EUD<br>Eudaimonic | HED<br>Hedonic<br>or<br>Subjective | MH<br>Mental<br>health | O<br>Other | PH<br>Physical<br>health | PRO<br>Productivity<br>or cognitive<br>performance | SOC | U<br>Unspecified |
| <b>Butala &amp; Muhič (2007)</b>          |                                                                    |                   |                                    |                        |            |                          |                                                    |     |                  |
| Affect                                    |                                                                    |                   | 1                                  |                        |            |                          |                                                    |     |                  |
| Building Design and<br>Facilities         | 1                                                                  |                   |                                    |                        |            |                          |                                                    |     |                  |
| Cognitive Performance                     |                                                                    |                   |                                    |                        |            |                          | 1                                                  |     |                  |
| Indoor Environmental Quality              | 1                                                                  |                   |                                    |                        |            |                          |                                                    |     |                  |
| Productivity                              |                                                                    |                   |                                    |                        |            |                          | 1                                                  |     |                  |
| Self-reported symptoms                    |                                                                    |                   |                                    |                        |            | 2                        |                                                    |     |                  |
| Stress                                    |                                                                    |                   |                                    | 1                      |            |                          |                                                    |     |                  |
| <b>Denk, Jimenez, &amp; Schulz (2015)</b> |                                                                    |                   |                                    |                        |            |                          |                                                    |     |                  |
| Affect                                    |                                                                    |                   | 1                                  |                        |            |                          |                                                    |     |                  |
| Cognitive Performance                     |                                                                    |                   |                                    |                        |            |                          | 1                                                  |     |                  |
| Comfort                                   | 1                                                                  |                   |                                    |                        |            |                          |                                                    |     |                  |
| Psychological States and<br>Traits        |                                                                    |                   |                                    | 1                      |            |                          |                                                    |     |                  |
| <b>Easterbrook &amp; Vignoles (2015)</b>  |                                                                    |                   |                                    |                        |            |                          |                                                    |     |                  |
| Affect                                    |                                                                    |                   | 1                                  |                        |            |                          |                                                    |     |                  |
| Participation and Interaction             |                                                                    |                   |                                    |                        |            |                          |                                                    | 1   |                  |
| Sense of Inclusion                        |                                                                    |                   |                                    |                        |            |                          |                                                    | 1   |                  |
| <b>Fostervold &amp; Nersveen (2008)</b>   |                                                                    |                   |                                    |                        |            |                          |                                                    |     |                  |
| Affect                                    |                                                                    |                   | 1                                  |                        |            |                          |                                                    |     |                  |
| Building Design and<br>Facilities         | 1                                                                  |                   |                                    |                        |            |                          |                                                    |     |                  |
| Cognitive Performance                     |                                                                    |                   |                                    |                        |            |                          | 2                                                  |     |                  |
| Indoor Environmental Quality              | 1                                                                  |                   |                                    |                        |            |                          |                                                    |     |                  |
| Psychological States and<br>Traits        |                                                                    |                   |                                    | 1                      |            |                          |                                                    |     |                  |
| Satisfaction                              |                                                                    |                   | 1                                  |                        |            |                          |                                                    |     |                  |
| Self-reported symptoms                    |                                                                    |                   |                                    |                        |            | 1                        |                                                    |     |                  |
| Stress                                    |                                                                    |                   |                                    | 1                      |            |                          |                                                    |     |                  |
| <b>Kang, Lee, Kim, &amp; Kim (2014)</b>   |                                                                    |                   |                                    |                        |            |                          |                                                    |     |                  |
| Building Design and<br>Facilities         | 1                                                                  |                   |                                    |                        |            |                          |                                                    |     |                  |
| Indoor Environmental Quality              | 1                                                                  |                   |                                    |                        |            |                          |                                                    |     |                  |
| Managerial                                |                                                                    |                   |                                    |                        | 1          |                          |                                                    |     |                  |
| Other                                     |                                                                    |                   |                                    |                        |            |                          |                                                    | 1   |                  |
| Participation and Interaction             |                                                                    |                   |                                    |                        |            |                          |                                                    | 1   |                  |
| Sense of Inclusion                        |                                                                    |                   |                                    |                        |            |                          |                                                    | 1   |                  |
| <b>Lamb, Kwok, &amp; Walton (2014)</b>    |                                                                    |                   |                                    |                        |            |                          |                                                    |     |                  |
| Affect                                    |                                                                    |                   | 1                                  |                        |            |                          |                                                    |     |                  |
| Cognitive Performance                     |                                                                    |                   |                                    |                        |            |                          | 1                                                  |     |                  |
| Illness                                   |                                                                    |                   |                                    |                        |            | 1                        |                                                    |     |                  |
| Indoor Environmental Quality              | 1                                                                  |                   |                                    |                        |            |                          |                                                    |     |                  |
| Other                                     | 1                                                                  |                   |                                    |                        |            |                          |                                                    |     |                  |

| Conceptual themes                          |                                                                    |                   |                                    |                        |            |                          |                                                    |     |                  |
|--------------------------------------------|--------------------------------------------------------------------|-------------------|------------------------------------|------------------------|------------|--------------------------|----------------------------------------------------|-----|------------------|
| PAPER CITATION /<br>CONCEPTUAL SUBTHEMES   | ENV<br>Environmental<br>Quality,<br>Satisfaction<br>and/or Comfort | EUD<br>Eudaimonic | HED<br>Hedonic<br>or<br>Subjective | MH<br>Mental<br>health | O<br>Other | PH<br>Physical<br>health | PRO<br>Productivity<br>or cognitive<br>performance | SOC | U<br>Unspecified |
| Personal Growth                            |                                                                    | 1                 |                                    |                        |            |                          |                                                    |     |                  |
| Productivity                               |                                                                    |                   |                                    |                        |            |                          | 1                                                  |     |                  |
| Satisfaction                               |                                                                    |                   | 1                                  |                        |            |                          |                                                    |     |                  |
| Self-reported symptoms                     |                                                                    |                   |                                    |                        |            | 2                        |                                                    |     |                  |
| Stress                                     |                                                                    |                   |                                    | 1                      |            |                          |                                                    |     |                  |
| <b>Lee, Je, &amp; Byun (2011)</b>          |                                                                    |                   |                                    |                        |            |                          |                                                    |     |                  |
| Building Design and<br>Facilities          | 1                                                                  |                   |                                    |                        |            |                          |                                                    |     |                  |
| Frailty, mobility and safety               |                                                                    |                   |                                    |                        |            | 1                        |                                                    |     |                  |
| <b>Muhammad, Sapri, &amp; Sipan (2014)</b> |                                                                    |                   |                                    |                        |            |                          |                                                    |     |                  |
| Building Design and<br>Facilities          | 1                                                                  |                   |                                    |                        |            |                          |                                                    |     |                  |
| Indoor Environmental Quality               | 1                                                                  |                   |                                    |                        |            |                          |                                                    |     |                  |
| Learning                                   |                                                                    |                   |                                    |                        |            |                          | 1                                                  |     |                  |
| Participation and Interaction              |                                                                    |                   |                                    |                        |            |                          |                                                    | 2   |                  |
| Productivity                               |                                                                    |                   |                                    |                        |            |                          | 1                                                  |     |                  |
| <b>Neuner and Seidel (2006)</b>            |                                                                    |                   |                                    |                        |            |                          |                                                    |     |                  |
| Control                                    | 1                                                                  |                   |                                    |                        |            |                          |                                                    |     |                  |
| Happiness                                  |                                                                    |                   | 1                                  |                        |            |                          |                                                    |     |                  |
| Indoor Environmental Quality               | 1                                                                  |                   |                                    |                        |            |                          |                                                    |     |                  |
| Self-reported symptoms                     |                                                                    |                   |                                    |                        |            | 1                        |                                                    |     |                  |
| <b>Newsham et al. (2009)</b>               |                                                                    |                   |                                    |                        |            |                          |                                                    |     |                  |
| Affect                                     |                                                                    |                   | 1                                  |                        |            |                          |                                                    |     |                  |
| Building Design and<br>Facilities          | 1                                                                  |                   |                                    |                        |            |                          |                                                    |     |                  |
| Familial Context                           |                                                                    |                   |                                    |                        |            |                          |                                                    | 1   |                  |
| Indoor Environmental Quality               | 1                                                                  |                   |                                    |                        |            |                          |                                                    |     |                  |
| Satisfaction                               |                                                                    |                   | 1                                  |                        |            |                          |                                                    |     |                  |
| Self-reported symptoms                     |                                                                    |                   |                                    |                        |            | 2                        |                                                    |     |                  |
| Stress                                     |                                                                    |                   |                                    | 1                      |            |                          |                                                    |     |                  |
| <b>Pelenur &amp; Cruickshank (2013)</b>    |                                                                    |                   |                                    |                        |            |                          |                                                    |     |                  |
| Affect                                     |                                                                    |                   | 1                                  |                        |            |                          |                                                    |     |                  |
| Other                                      | 1                                                                  |                   |                                    |                        |            |                          |                                                    |     |                  |
| <b>Rioux (2005)</b>                        |                                                                    |                   |                                    |                        |            |                          |                                                    |     |                  |
| Other                                      | 1                                                                  |                   |                                    |                        |            |                          |                                                    |     |                  |
| Participation and Interaction              |                                                                    |                   |                                    |                        |            |                          |                                                    | 1   |                  |
| Satisfaction                               |                                                                    |                   | 1                                  |                        |            |                          |                                                    |     |                  |
| <b>Shafaghat et al (2014)</b>              |                                                                    |                   |                                    |                        |            |                          |                                                    |     |                  |
| Building Design and<br>Facilities          | 1                                                                  |                   |                                    |                        |            |                          |                                                    |     |                  |
| Control/Autonomy                           |                                                                    | 1                 |                                    |                        |            |                          |                                                    |     |                  |
| Cost Efficiency                            |                                                                    |                   |                                    |                        | 1          |                          |                                                    |     |                  |
| Illness                                    |                                                                    |                   |                                    |                        |            | 2                        |                                                    |     |                  |

| Conceptual themes                                                  |                                                                    |                   |                                    |                        |            |                          |                                                    |     |                  |
|--------------------------------------------------------------------|--------------------------------------------------------------------|-------------------|------------------------------------|------------------------|------------|--------------------------|----------------------------------------------------|-----|------------------|
| PAPER CITATION /<br>CONCEPTUAL SUBTHEMES                           | ENV<br>Environmental<br>Quality,<br>Satisfaction<br>and/or Comfort | EUD<br>Eudaimonic | HED<br>Hedonic<br>or<br>Subjective | MH<br>Mental<br>health | O<br>Other | PH<br>Physical<br>health | PRO<br>Productivity<br>or cognitive<br>performance | SOC | U<br>Unspecified |
| Indoor Environmental Quality                                       | 1                                                                  |                   |                                    |                        |            |                          |                                                    |     |                  |
| Negative Spatial<br>Experiences                                    |                                                                    |                   |                                    |                        |            |                          |                                                    | 1   |                  |
| Participation and Interaction                                      |                                                                    |                   |                                    |                        |            |                          |                                                    | 1   |                  |
| Sick Building Syndrome                                             |                                                                    |                   |                                    |                        |            | 1                        |                                                    |     |                  |
| Stress                                                             |                                                                    |                   |                                    | 1                      |            |                          |                                                    |     |                  |
| <b>Steemers &amp; Manchanda<br/>(2010)</b>                         |                                                                    |                   |                                    |                        |            |                          |                                                    |     |                  |
| Indoor Environmental Quality                                       | 1                                                                  |                   |                                    |                        |            |                          |                                                    |     |                  |
| Satisfaction                                                       |                                                                    |                   | 1                                  |                        |            |                          |                                                    |     |                  |
| Self-reported symptoms                                             |                                                                    |                   |                                    |                        |            | 1                        |                                                    |     |                  |
| <b>Tavakkoli, Asaadi, Pakpour,<br/>&amp; Hajiaghababaei (2015)</b> |                                                                    |                   |                                    |                        |            |                          |                                                    |     |                  |
| Illness                                                            |                                                                    |                   |                                    |                        |            | 1                        |                                                    |     |                  |
| Personal Wellbeing                                                 |                                                                    |                   |                                    |                        |            |                          |                                                    |     | 1                |
| Psychological States and<br>Traits                                 |                                                                    |                   |                                    | 1                      |            |                          |                                                    |     |                  |
| Satisfaction                                                       |                                                                    |                   | 1                                  |                        |            |                          |                                                    |     |                  |
| <b>Thatcher &amp; Milner (2014)</b>                                |                                                                    |                   |                                    |                        |            |                          |                                                    |     |                  |
| Satisfaction                                                       |                                                                    |                   | 1                                  |                        |            |                          |                                                    |     |                  |
| Absenteeism                                                        |                                                                    |                   |                                    |                        | 1          |                          |                                                    |     |                  |
| Affect                                                             |                                                                    |                   | 1                                  |                        |            |                          |                                                    |     |                  |
| Building Design and<br>Facilities                                  | 1                                                                  |                   |                                    |                        |            |                          |                                                    |     |                  |
| Other                                                              |                                                                    | 1                 |                                    |                        |            |                          |                                                    |     |                  |
| Presenteeism                                                       |                                                                    |                   |                                    |                        | 1          |                          |                                                    |     |                  |
| Productivity                                                       |                                                                    |                   |                                    |                        |            |                          | 1                                                  |     |                  |
| Sense of Inclusion                                                 |                                                                    |                   |                                    |                        |            |                          |                                                    | 1   |                  |
| Sick Building Syndrome                                             |                                                                    |                   |                                    |                        |            | 1                        |                                                    |     |                  |
| <b>Torrington (2007)</b>                                           |                                                                    |                   |                                    |                        |            |                          |                                                    |     |                  |
| Affect                                                             |                                                                    |                   | 1                                  |                        |            |                          |                                                    |     |                  |
| Building Design and<br>Facilities                                  | 1                                                                  |                   |                                    |                        |            |                          |                                                    |     |                  |
| Control                                                            | 1                                                                  |                   |                                    |                        |            |                          |                                                    |     |                  |
| Familial Context                                                   |                                                                    |                   |                                    |                        |            |                          |                                                    | 1   |                  |
| Frailty, mobility and safety                                       |                                                                    |                   |                                    |                        |            | 1                        |                                                    |     |                  |
| Other                                                              | 1                                                                  | 1                 |                                    | 1                      |            |                          |                                                    |     |                  |
| Participation and Interaction                                      |                                                                    |                   |                                    |                        |            |                          |                                                    | 1   |                  |
| Satisfaction                                                       |                                                                    |                   | 1                                  |                        |            |                          |                                                    |     |                  |
| Stress                                                             |                                                                    |                   |                                    | 1                      |            |                          |                                                    |     |                  |
| <b>Turunen et al. (2014)</b>                                       |                                                                    |                   |                                    |                        |            |                          |                                                    |     |                  |
| Cognitive Performance                                              |                                                                    |                   |                                    |                        |            |                          | 1                                                  |     |                  |
| Illness                                                            |                                                                    |                   |                                    |                        |            | 1                        |                                                    |     |                  |
| Indoor Environmental Quality                                       | 1                                                                  |                   |                                    |                        |            |                          |                                                    |     |                  |
| Learning                                                           |                                                                    |                   |                                    |                        |            |                          | 2                                                  |     |                  |

| PAPER CITATION /<br>CONCEPTUAL SUBTHEMES | Conceptual themes                                                  |                   |                                    |                        |            |                          |                                                    |               |                  |
|------------------------------------------|--------------------------------------------------------------------|-------------------|------------------------------------|------------------------|------------|--------------------------|----------------------------------------------------|---------------|------------------|
|                                          | ENV<br>Environmental<br>Quality,<br>Satisfaction<br>and/or Comfort | EUD<br>Eudaimonic | HED<br>Hedonic<br>or<br>Subjective | MH<br>Mental<br>health | O<br>Other | PH<br>Physical<br>health | PRO<br>Productivity<br>or cognitive<br>performance | SOC<br>Social | U<br>Unspecified |
| Self-reported symptoms                   |                                                                    |                   |                                    |                        |            | 2                        |                                                    |               |                  |
| Wellbeing                                |                                                                    |                   |                                    |                        |            |                          |                                                    |               | 1                |
| <b>Wilson et al. (2014)</b>              |                                                                    |                   |                                    |                        |            |                          |                                                    |               |                  |
| Building Design and<br>Facilities        | 1                                                                  |                   |                                    |                        |            |                          |                                                    |               |                  |
| Psychological States and<br>Traits       |                                                                    |                   |                                    | 1                      |            |                          |                                                    |               |                  |
| Self-reported symptoms                   |                                                                    |                   |                                    |                        |            | 1                        |                                                    |               |                  |
| <b>Wu &amp; Noy (2010)</b>               |                                                                    |                   |                                    |                        |            |                          |                                                    |               |                  |
| Indoor Environmental Quality             | 1                                                                  |                   |                                    |                        |            |                          |                                                    |               |                  |
| <b>Grand Total</b>                       | <b>37</b>                                                          | <b>7</b>          | <b>21</b>                          | <b>15</b>              | <b>7</b>   | <b>25</b>                | <b>14</b>                                          | <b>21</b>     | <b>3</b>         |

## Additional references

### Please also refer to the references listed in the published article

- Bernstein, D.A., Penner, L.A., Clarke-Stewart, A., & Roy, E.J. (2003). *Psychology* (6th ed.). Boston: Houghton Mifflin Co.
- Cascio, W.F. (1987). *Applied Psychology in Personnel Management* (3rd ed.). Englewood Cliffs, NJ: Prentice-Hall
- Costanza, R., Fisher, B., Ali, S., Beer, C., Bond, L., Boumans, R., ... Snapp, R. (2007). Quality of life: An approach integrating opportunities, human needs, and subjective well-being. *Ecological Economics*, 61(2), 267–276.
- Diener, E., Emmons, R. A., Larsen, R.J., & Griffin, S. (1985). The satisfaction with life scale. *Journal of Personality Assessment*, 49(1), 71–75.
- Headey, B., & Wooden, M. (2004). The effects of wealth and income on subjective well-being and ill-being. Discussion paper No. 1032, February 2004. Bonn: Forschungsinstitut zur Zukunft der Arbeit (IZA).
- Ibem, E. O., Opoko, A. P., Adeboye, A. B. & Amole, D. (2013). Performance evaluation of residential buildings in public housing estates in Ogun State, Nigeria: Users' satisfaction perspective. *Frontiers of Architectural Research*, 2(2), 178–190.
- Keyes, C. L. M., Shmotkin, D., & Ryff, C.D. (2002). Optimizing well-being: The empirical encounter of two traditions. *Journal of Personality and Social Psychology*. 82(6), 1007–1022.
- Mahoney, T.A. (1988). Productivity defined: The relativity of efficiency, effectiveness, and change. In: J.P. Campbell, R.J. Campbell and Associates (Eds.). *Productivity in Organizations: New Perspectives from Industrial and Organizational Psychology* (pp.13–39). San Francisco: Jossey-Bass.
- Shin, D. C. & Johnson, D.M. (1978). Avowed happiness as an overall assessment of the quality of life. *Social Indicators Research*, 5, 475–492.
- Shin, J. (2015). Toward a theory of environmental satisfaction and human comfort: A process-oriented and contextually sensitive theoretical framework. *Journal of Environmental Psychology*, 45, 11–21.
- Tatarkiewicz, W. (1976). *Analysis of Happiness*. The Hague, Netherlands: Martinus Nijhoff.
